# Supplementary material for: Solvent-induced self-assembly synthesis of ultralong single crystalline organic NiOEP nanowires with high photoconductivity
Source: Royal Society of Chemistry journal article supplement (doi:10.1039/c5ra14266k), 2015-01-01
Supplement: c5ra14266k1.pdf [file c5ra14266k1.pdf]

*Supporting Information:*

## **Solvent-induced self-assembly synthesis of ultralong single crystalline organic NiOEP nanowires with high photoconductivity**

<sup>a</sup> College of Chemistry and Environmental Engineering, Changchun University of Science and Technology, 130022 Changchun, China. E-mail: [yjh@cust.edu.cn](mailto:yjh@cust.edu.cn)

<sup>b</sup> Suzhou Institute of Nano-tech and Nano-bionics, Chinese Academy of Sciences, 215123 Suzhou, P. R. China. E-mail: [gbpan2008@sinano.ac.cn](mailto:gbpan2008@sinano.ac.cn); Fax: +86-512-62872663

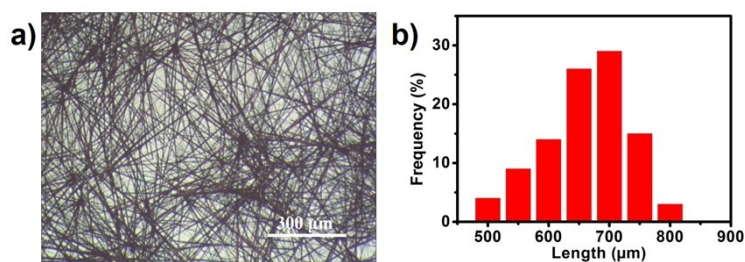

Fig. S1 (a) Optical image of the NiOEP nanowires. (b) Distribution of length of NiOEP nanowires.

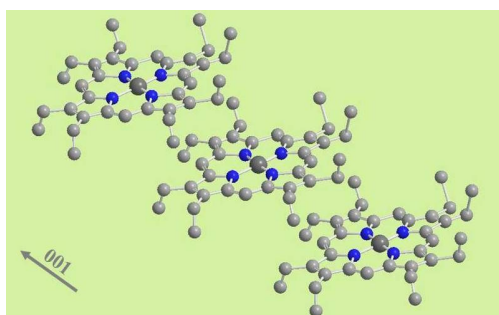

Fig. S2. Schematic illustration of molecule stacking in NiOEP nanowires.

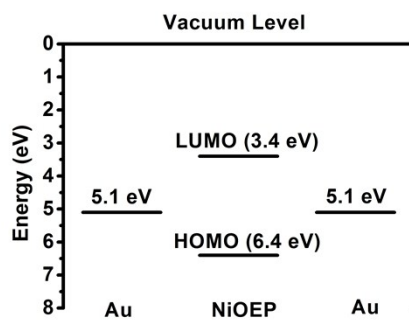

Fig. S3 Schematic diagram for the energy band of the device.

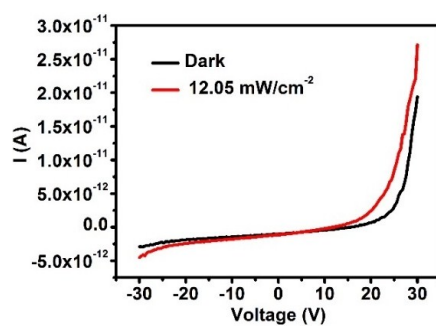

Fig. S4 I-V curves of the device based on short NiOEP nanowires.

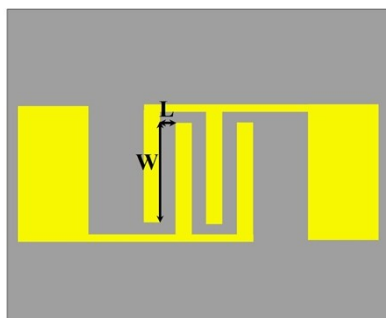

Fig. S5 Geometry of the finger electrode.  $L = 20 \mu\text{m}$ , and  $W = 160 \mu\text{m}$ .
